# Supplementary material
Source: Research Square preprint supplement (doi:10.21203/rs.3.rs-9444295/v1)

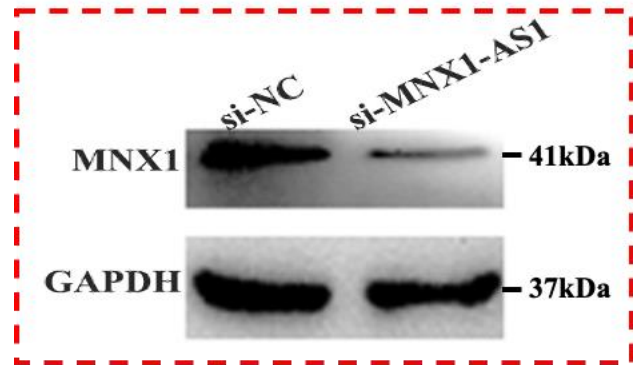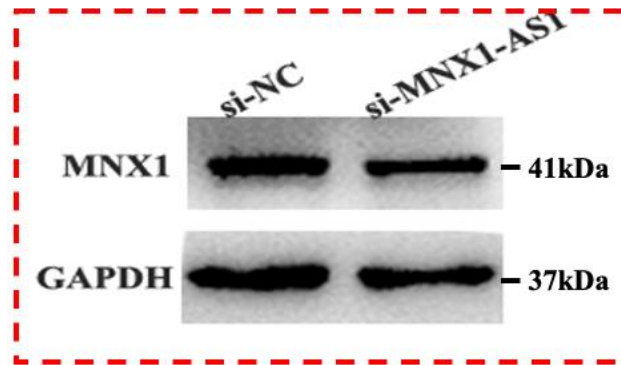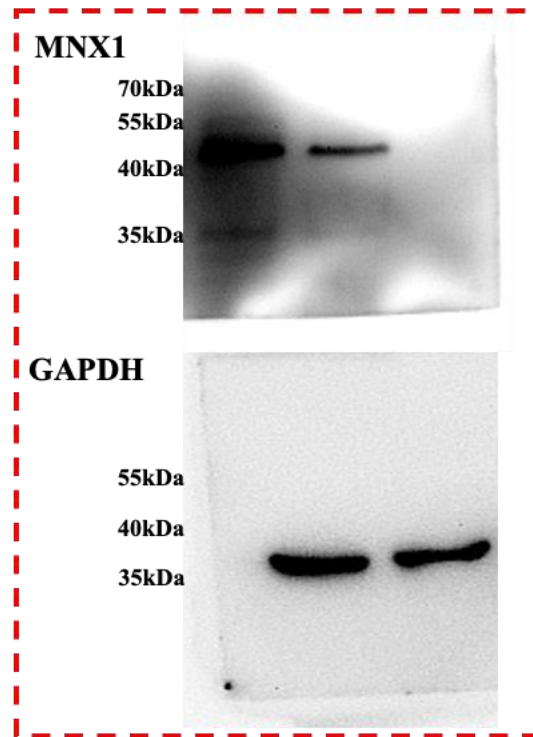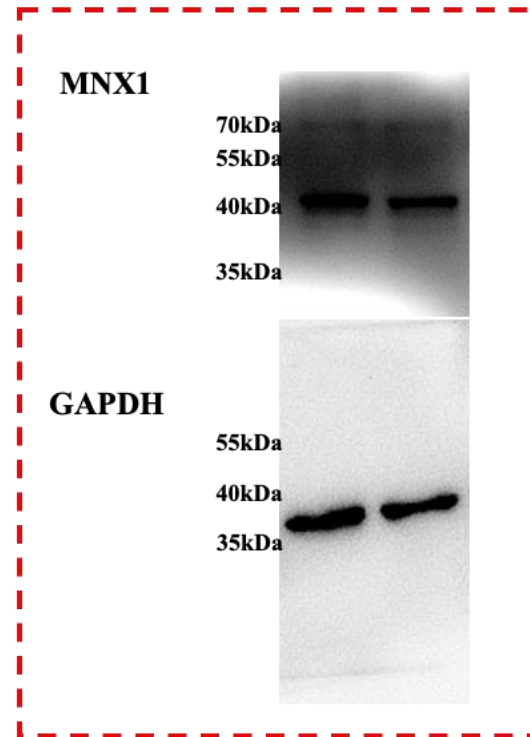

Supplement: Supplementary file 1 [file 54be0f2ee6e1c91649c35fa1.pdf]
